# Supplementary material
Source: Elsevier journal article supplement (https://rcastoragev2.blob.core.windows.net/c0fde5b2971f4488406ba8d50a114bea/mmc1.pdf)
Supplement: mmc1 [file mmc1.pdf]

**Cell Reports, Volume 15**

## **Supplemental Information**

### **Nuclear Envelope Protein SUN2 Promotes**

### **Cyclophilin-A-Dependent Steps of HIV Replication**

**Xavier Lahaye, Takeshi Satoh, Matteo Gentili, Silvia Cerboni, Aymeric Silvin, Cécile Conrad, Abdelhakim Ahmed-Belkacem, Elisa C. Rodriguez, Jean-François Guichou, Nathalie Bosquet, Matthieu Piel, Roger Le Grand, Megan C. King, Jean-Michel Pawlotsky, and Nicolas Manel**

FIGURE S1

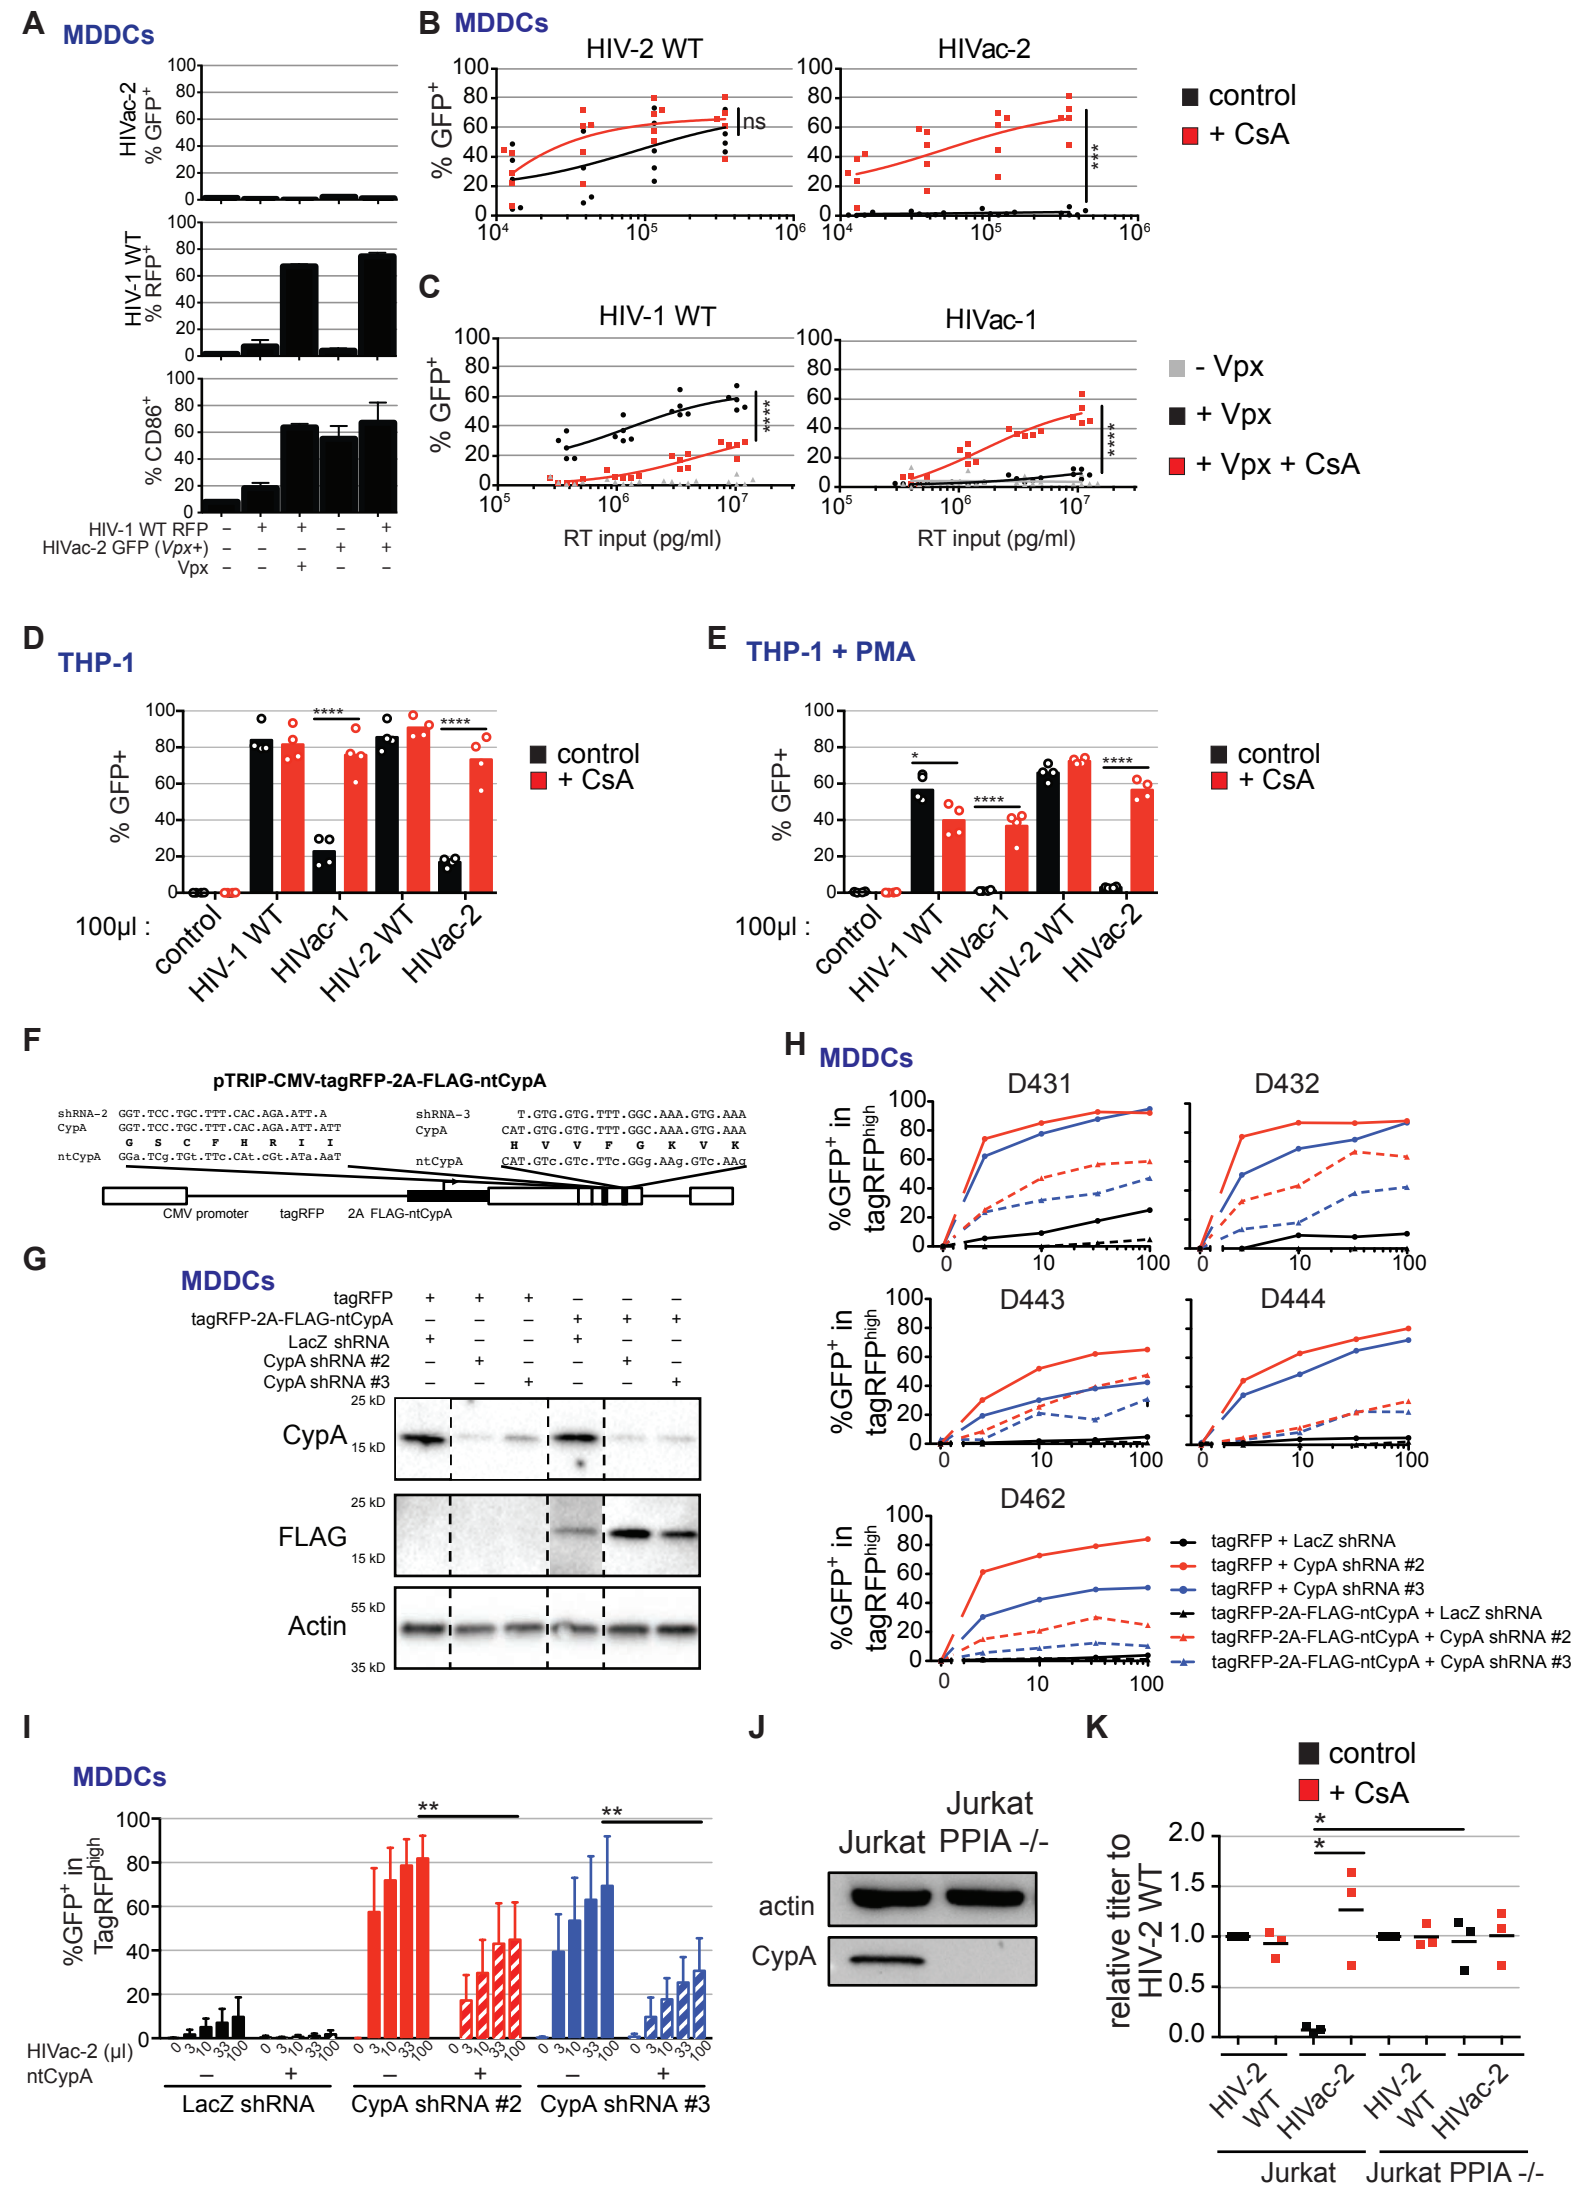

**Figure S1 CypA is required for a restriction of HIV-1 and HIV-2 capsid mutants, related to Figure 1**

**(A)** GFP, RFP and CD86 expression in MDDCs 48h after infection or co-infection with HIVac-2 (encoding GFP in Nef) and HIV-1 WT (encoding RFP in Nef) and pseudotyped with VSV-G in the presence or absence of SIVmac251 VLPs (n=2, bar indicates mean +/- SEM).

**(B)** Dose-response GFP expression for infections with HIV-2 and HIVac-2 as in 1A (n=5, paired t-test, \*\*\*p<0.001, "ns" stands for not statistically significant, line indicates mean).

**(C)** Dose-response GFP expression for infections with HIV-1 and HIVac-1 as in 1A (n=5, paired t-test, \*\*\*p<0.0001, line indicates mean).

**(D)** GFP expression in THP-1 cells 48 hours after infection with HIV-1WT, HIVac-1, HIV-2 WT, and HIVac-2, in the presence or absence of CsA (n=4, paired t-test, \*\*\*\*p<0.0001, bar indicates mean). Virus inoculum volume is indicated.

**(E)** GFP expression in PMA-differentiated THP-1 cells 48 hours after infection with HIV-1WT, HIVac-1, HIV-2 WT, and HIVac-2, in the presence or absence of CsA (n=4, paired t-test, \*p<0.05, \*\*\*\*p<0.0001, bar indicates mean). Virus inoculum volume is indicated.

**(F)** Design of the non-targetable CypA (ntCypA) open-reading frame for shRNA rescue used in 1D.

**(G)** Detection of endogenous CypA, FLAG-ntCypA and actin as in 1I. Dashes indicate image clipping of the same exposure. Not shown: FLAG-ntCypA is detected with anti-CypA at longer exposures.

**(H)** Dose-response of GFP expression in tagRFP<sup>high</sup> cells for each individual donor. Virus inoculum volume is indicated.

**(I)** Averaged data on dose-response of GFP expression in tagRFP<sup>high</sup> cells as in 1I (n=5, paired t-test, \*\*p<0.01, bar indicates mean +/- SEM). Virus inoculum volume is indicated.

**(J)** Western blot analysis of CypA and actin expression on Jurkat and Jurkat *PPIA*<sup>-/-</sup> cell lines.

**(K)** Relative titer of HIV-2 WT and HIVac-2 on Jurkat and Jurkat *PPIA*<sup>-/-</sup> cell lines reported under HIV-2 WT infection, in the presence or absence of CsA (2μM) (n=3, paired t-test \*p<0.05, line indicates mean).

FIGURE S2

A

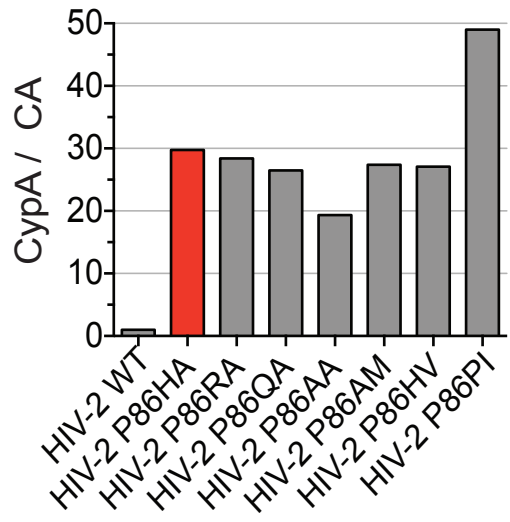

B

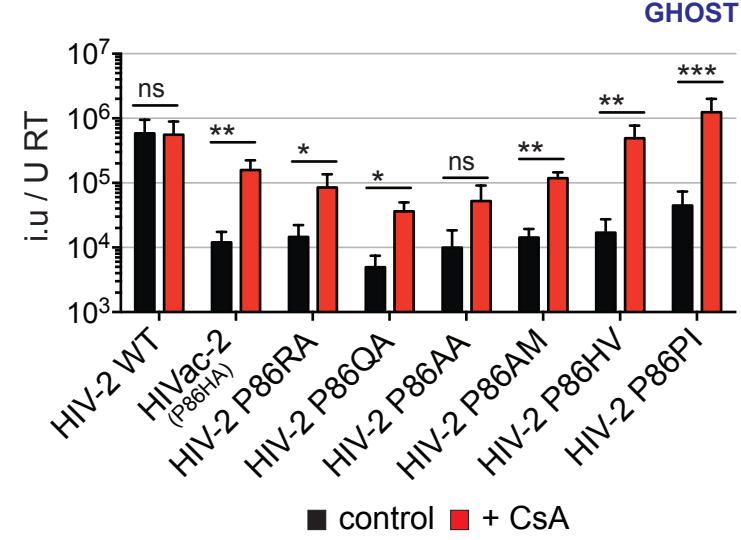

C

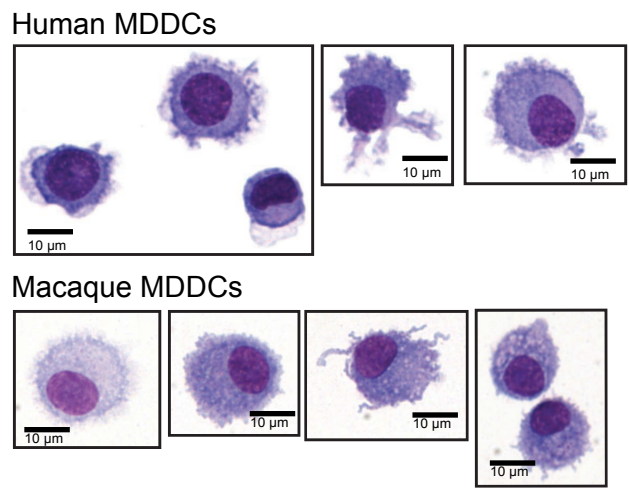

**Figure S2 CypA induces a direct antiviral resistance against a family of capsid mutants in HIV and SIV that is conserved in human and macaque cells, related to Figure 2**

**(A)** Ratios of CypA over capsid in viral particles, quantified from western blot analyses against Gag/Capsid and CypA on viral particles. Ratios were normalized to HIV-2 (n=1).

**(B)** Infectious titer of HIV-2 WT, HIVac-2 and additional HIV-2 mutants (as indicated) on GHOST cells normalized to reverse transcriptase activity in the viral inoculum, in the presence or absence of CsA (2 $\mu$ M) (n=3, paired t-test on log-transformed data, \*p<0.05, \*\*p<0.01, \*\*\*p<0.001, "ns" stands for not statistically significant, bar indicates mean +/- SEM).

**(C)** Human and Macaque MDDCs by Giemsa/May–Grünwald staining. The figure is a composite of different fields. Bar = 10  $\mu$ m.

FIGURE S3

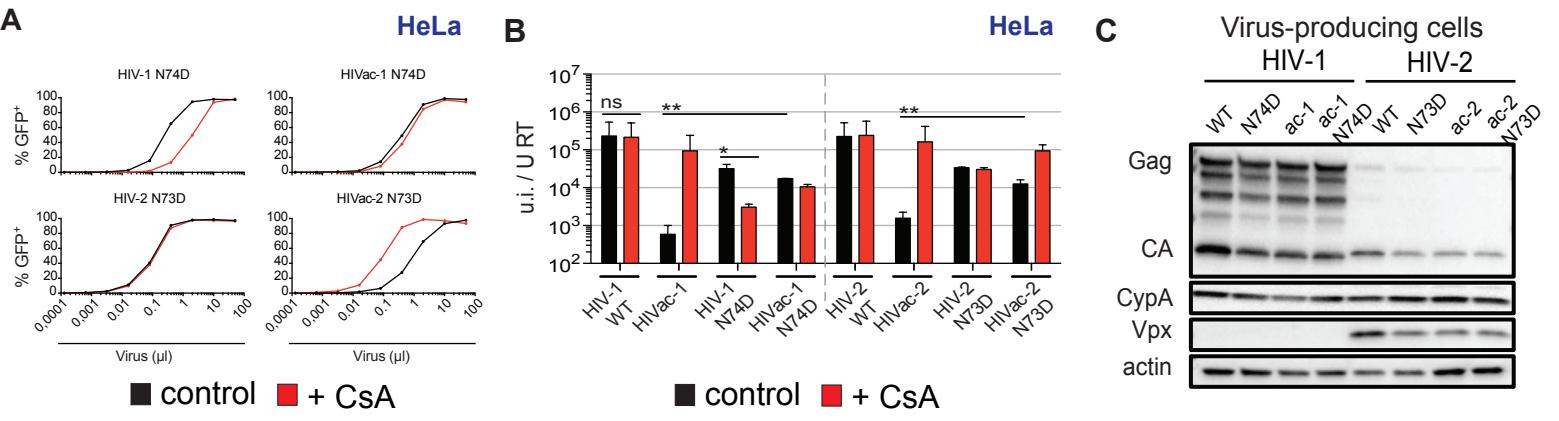

**Figure S3 Second-site mutations in HIVac capsid rescue the CypA restriction, related to Figure 3**

**(A)** Dose-response of GFP expression after infection of HeLa cells with the indicated viruses encoding, in the presence or absence of CsA (2 $\mu$ M) (n=3; representative data for 1 donor is shown). Virus inoculum volume is indicated.

**(B)** Infectious titer of indicated viruses on HeLa cells, normalized to reverse transcriptase activity in the inoculum, in the presence or absence of CsA (2 $\mu$ M) (n=3, paired t-test on log-transformed data, \*p<0.05, \*\*p<0.01, "ns" stands for not statistically significant, bar indicates mean  $\pm$  SEM).

**(C)** Western blot analysis of Gag/Capsid, CypA, Vpx and actin in virus-producing cells as in 3E

FIGURE S4

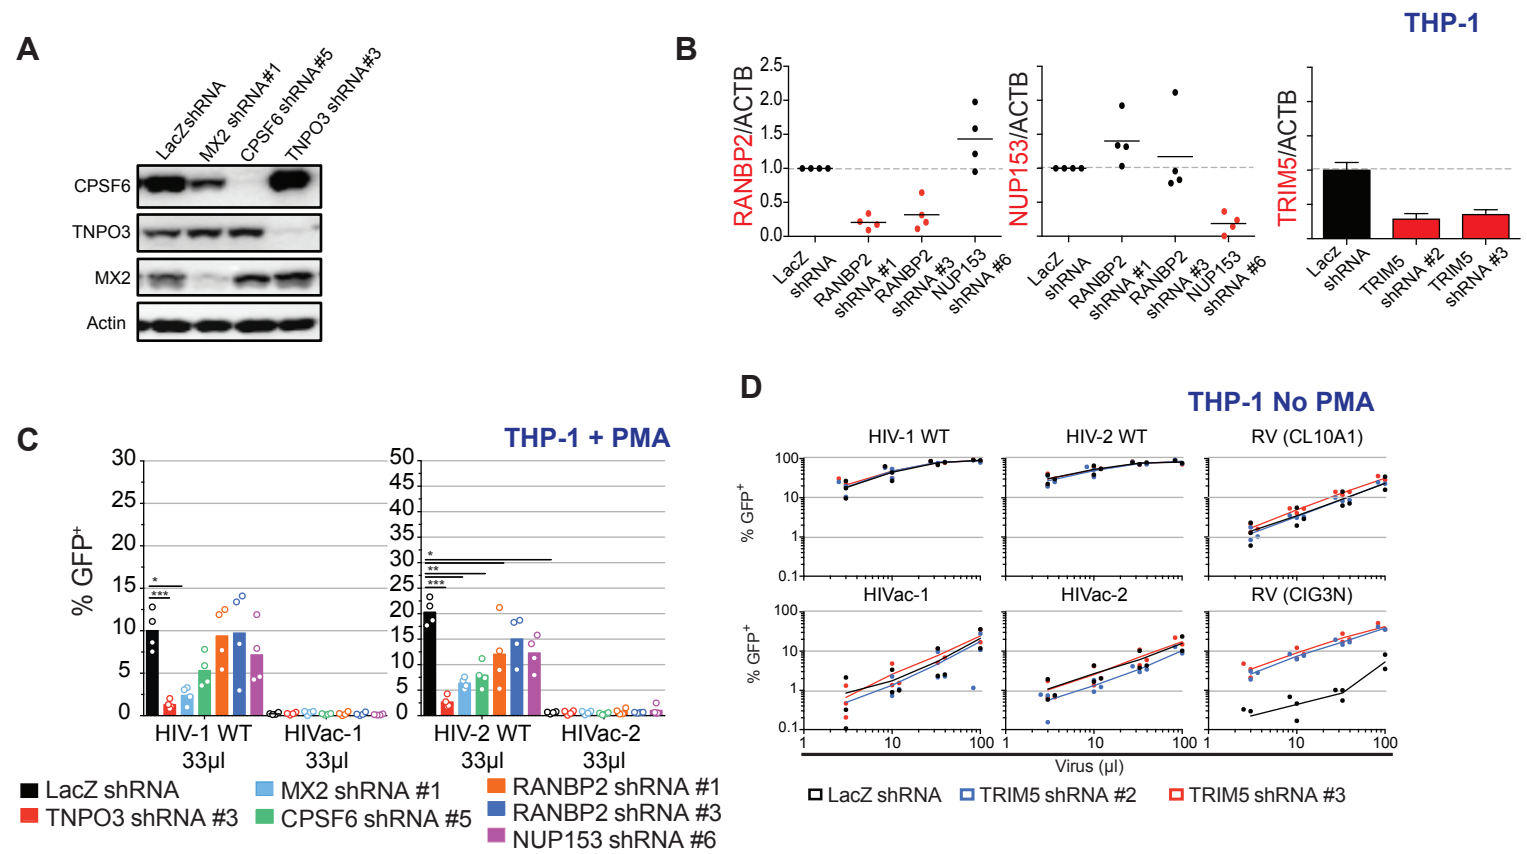



**Figure S4 Role of known capsid-associated factors in the restriction, related to Figure 4**

**(A)** Western blot analysis of TNPO3, CPSF6, MX2 in THP-1 knock-down cell lines.

**(B)** Expression of NUP153, RANBP2 and TRIM5 measured by RT-qPCR in THP-1 knock-down cell lines (Line indicates mean, bar indicates mean  $\pm$  SEM).

**(C)** GFP expression as in 4A (n=4, paired t-test, \*p<0.05, \*\*p<0.01, \*\*\*p<0.001, bar indicates mean). Virus inoculum volume is indicated.

**(D)** Dose response of GFP expression as in 4B (n=4, line indicates mean). Virus inoculum volume is indicated.

FIGURE S5

## A MDDCs

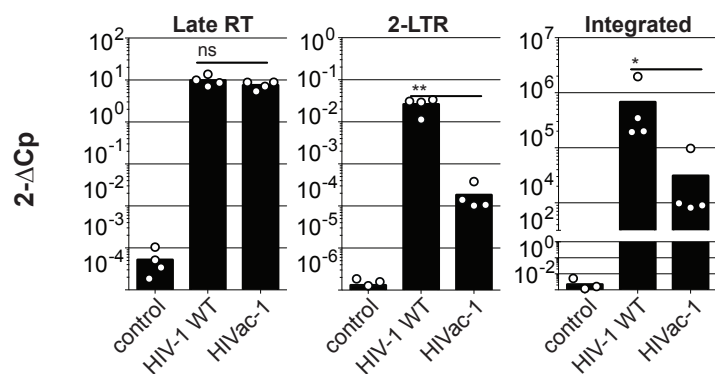

## B

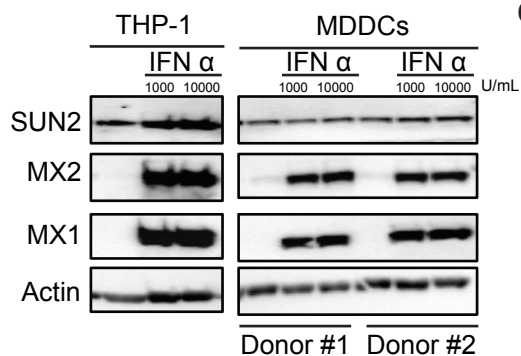

## C

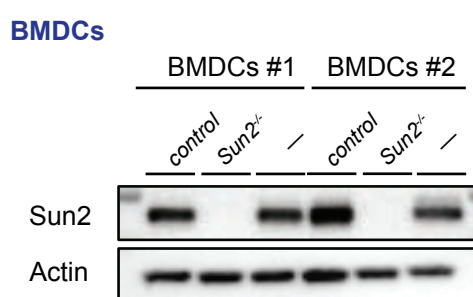

## D

### BMDCs

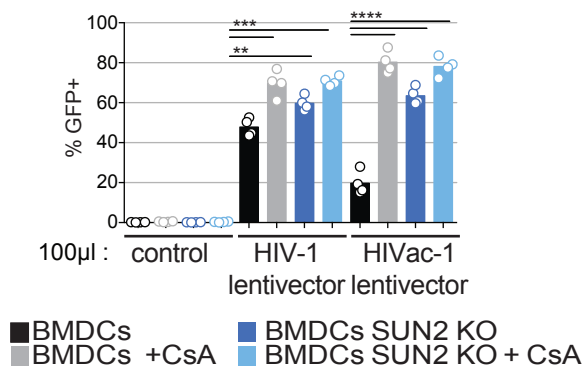

## E

### HeLa

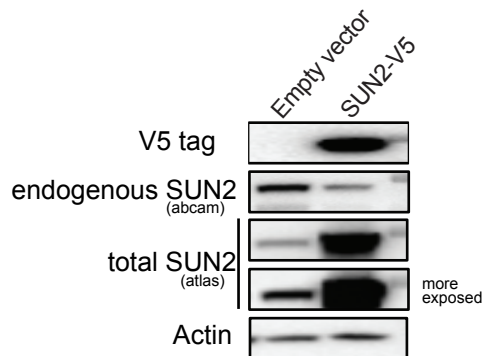

**Figure S5 SUN2 is essential for the CypA restriction of HIVac capsid, related to Figure 5**

**(A)** Quantification of late RT, 2LTR circles and integrated viral cDNA products 18 hours after infection of DCs with HIV-1 WT or HIVac-1 in the presence of SIVmac251 VLPs. (n=4; paired t-test on log-transformed data, \*\*\*p<0.001, "ns" stands for not statistically significant, bar indicates mean).

**(B)** Western blot analysis of SUN2 expression in THP-1 cell lines and MDDCs after 24h of IFN $\alpha$  treatment (1000 U/ml and 10000 U/ml).

**(C)** Western blot analysis of Sun2 protein expression in BMDCs (WT control or *Sun2*<sup>-/-</sup>) after 7 days of differentiation (dash indicates an unrelated sample).

**(D)** GFP expression in BMDCs as in 5B and 5C (n=4, paired RM ANOVA one-way test, \*\*\*\*p<0.0001, "ns" stands for not statistically significant, bar indicates mean). Virus inoculum volume is indicated.

**(E)** Western blot analysis of SUN2 expression in control HeLa cells (Empty vector) or HeLa overexpressing SUN2 (SUN2-V5). Atlas anti-SUN2 detects endogenous and V5-tagged SUN2, while Abcam anti-SUN2 detects only endogenous SUN2.

FIGURE S6

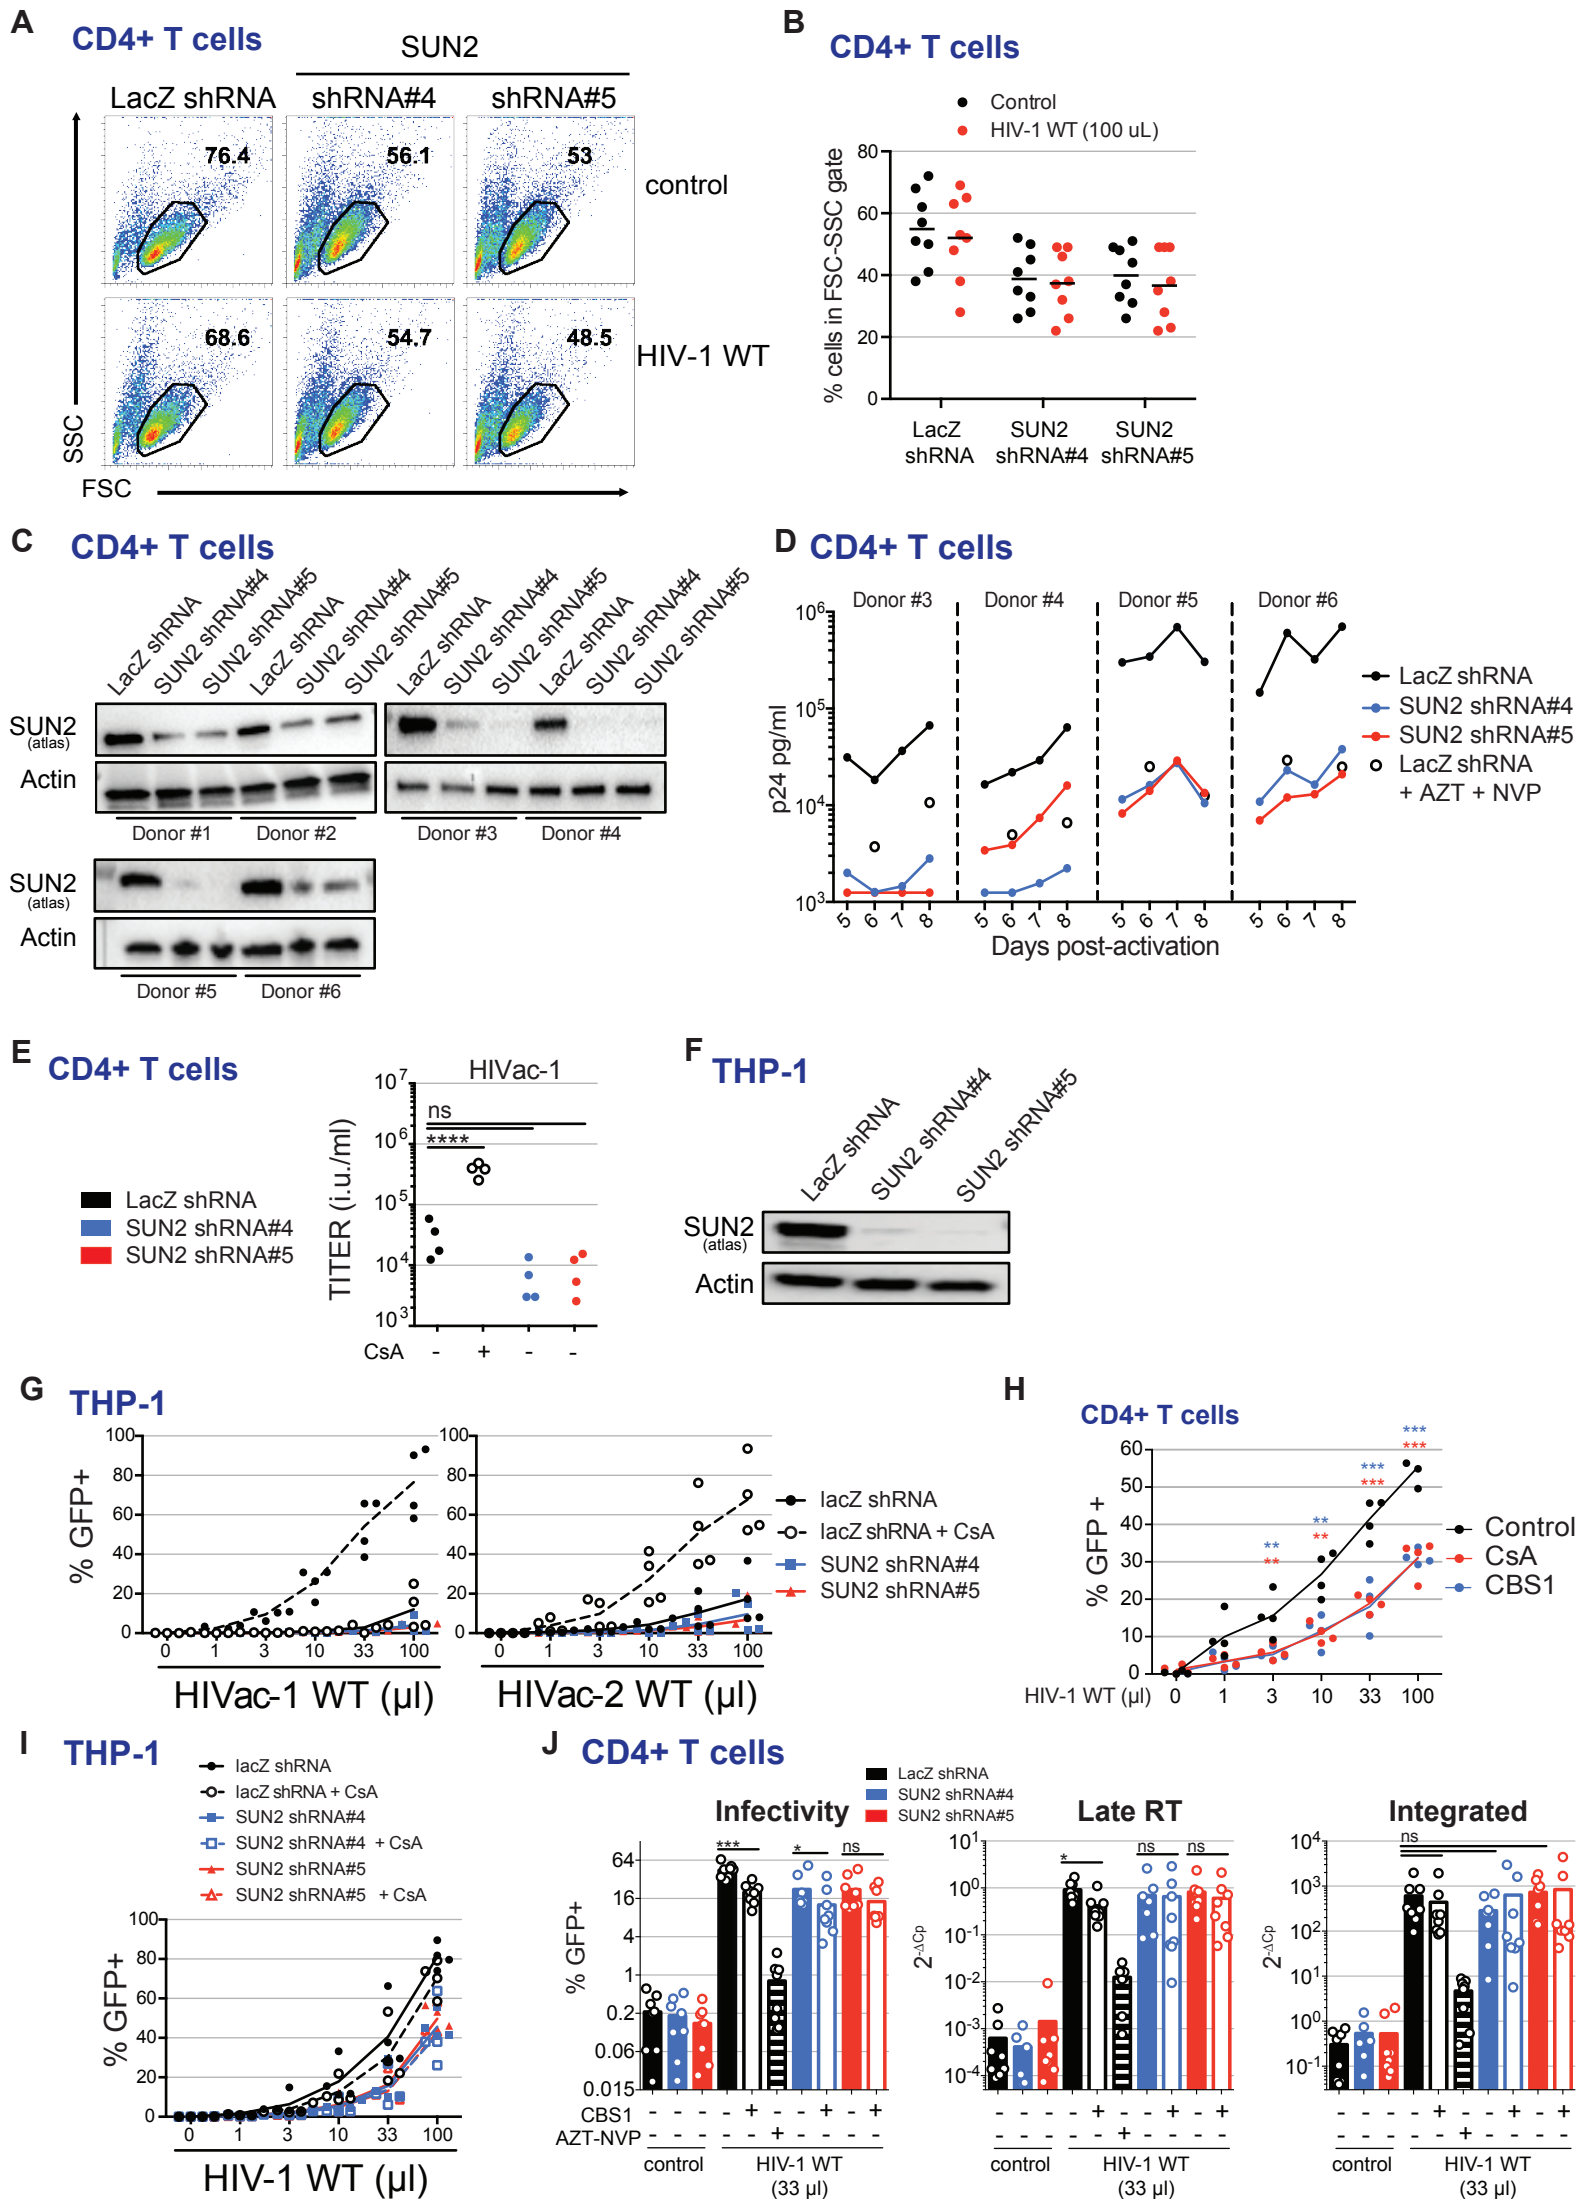

**Figure S6 SUN2 is an essential host factor of HIV-1 and HIV-2 in primary CD4+ target cells, related to Figure 6**

- (A) FSC and SCC profiles of control and SUN2-depleted cells as in 6D (n=8).
- (B) Proportion of cells in the FSC-SCC live cell gate as in S6A (n=8, line indicates mean).
- (C) Western blot analysis of SUN2 and actin expression as in 6E (n=6).
- (D) HIV-1 p24 concentration as in 6E, 6F (n=6; 4 additional donors shown).
- (E) Titer of HIVac-1 calculated from infection as in 6D, in the presence or absence of CsA (2  $\mu$ M) (n=4, paired RM ANOVA one-way test, \*\*\*\*p<0.0001, "ns" stands for not statistically significant).
- (F) Western blot analysis of SUN2 and actin expression at the time of infection in THP-1 cells that were transduced with shRNA vectors against SUN2 (shRNA#4 or shRNA#5) or a shRNA control vector (LacZ shRNA).
- (G) THP-1 as in S6F infected HIVac-1 or HIVac-2 encoding GFP in Nef and pseudotyped with VSV-G. Proportion of GFP-positive cells after 48 hours of infection (n=4, line indicates mean). Virus inoculum volume is indicated.
- (H) Dose response of GFP expression in CD4+ T cells as in 6D, 48h after infection with HIV-1 WT, in the presence or absence of CsA (2  $\mu$ M, red) or CBS1 (60  $\mu$ M, line) (n=4, paired RM ANOVA one-way test, \*\*p<0.01, \*\*\*p<0.001, line indicates mean). Virus inoculum volume is indicated.
- (I) THP-1 as in S6F infected HIV-1 WT encoding GFP in Nef and pseudotyped with VSV-G. Proportion of GFP-positive cells after 48 hours of infection, in the presence or absence of CsA (2  $\mu$ M) (n=4, line indicates mean). Virus inoculum volume is indicated.
- (J) Proportion of GFP-positive cells and quantification of late RT and integrated viral cDNA products after 48 hours of infection as in 6D and treated or not with CBS1 (60 $\mu$ M) or 25  $\mu$ M of AZT with 10  $\mu$ M of NVP (n=8, paired RM ANOVA one-way test, \*\*\*p<0.001, \*p<0.05, "ns" stands for not statistically significant). Virus inoculum volume is indicated.

## Supplemental Tables

**Table S1 Mutagenized sequences used in the study, related to Experimental Procedures**

| Backbone  | Mutation                          | Original DNA sequence                                                                           | Mutagenized sequence                                                                                                  |
|-----------|-----------------------------------|-------------------------------------------------------------------------------------------------|-----------------------------------------------------------------------------------------------------------------------|
| HIV-1     | V86I-IAP91LPA-M96L (HIVac-1)      | CAT CCA <u>GTG</u> CAT GCA<br>GGG CCT <u>ATT</u> <u>GCA</u> <u>CCA</u><br>GGC CAG <u>ATG</u>    | CAT CCA <u>ATC</u> CAT GCA GGG<br>CCT <u>CTT</u> <u>CCA</u> <u>GCA</u> GGC CAG<br><u>CTG</u>                          |
| HIV-2     | P86HA (HIVac-2)                   | CAT CCA ATA <u>CCA</u> GGC<br>CCC TTA                                                           | CAT CCA ATA <u>CAT</u> <u>GCA</u> GGC<br>CCC TTA                                                                      |
| HIV-2     | P86RA                             | CAT CCA ATA <u>CCA</u> GGC<br>CCC TTA                                                           | CAT CCA ATA <u>AGG</u> <u>GCA</u> GGC<br>CCC TTA                                                                      |
| HIV-2     | P86QA                             | CAT CCA ATA <u>CCA</u> GGC<br>CCC TTA                                                           | CAT CCA ATA <u>CAG</u> <u>GCA</u> GGC<br>CCC TTA                                                                      |
| HIV-2     | P86AA                             | CAT CCA ATA <u>CCA</u> GGC<br>CCC TTA                                                           | CAT CCA ATA <u>GCT</u> <u>GCA</u> GGC<br>CCC TTA                                                                      |
| HIV-2     | P86AM                             | CAT CCA ATA <u>CCA</u> GGC<br>CCC TTA                                                           | CAT CCA ATA <u>GCT</u> <u>ATG</u> GGC<br>CCC TTA                                                                      |
| HIV-2     | P86HV                             | CAT CCA ATA <u>CCA</u> GGC<br>CCC TTA                                                           | CAT CCA ATA <u>CAT</u> <u>GTA</u> GGC<br>CCC TTA                                                                      |
| HIV-2     | P86PI                             | CAT CCA ATA <u>CCA</u> GGC<br>CCC TTA                                                           | CAT CCA ATA <u>CCA</u> <u>ATT</u> GGC<br>CCC TTA                                                                      |
| SIVmac239 | SIVmac239<br>QPAPQQ85IHAGPLP<br>A | CAG CAC CCA <u>CAA</u> <u>CCA</u><br><u>GCT</u> <u>CCA</u> <u>CAA</u> <u>CAA</u> GGA<br>CAA CTT | CAG CAC CCA <u>ATA</u> <u>CAT</u> <u>GCT</u><br><u>GGC</u> <u>CCA</u> <u>TTA</u> <u>CCA</u> <u>GCG</u> GGA<br>CAA CTT |
| HIV-1     | N74D                              | GAG ACC ATC <u>AAT</u> GAG<br>GAA GCT                                                           | GAG ACC ATC <u>GAT</u> GAG GAA<br>GCT                                                                                 |
| HIV-2     | N73D                              | GAG ATT ATC <u>AAT</u> GAG<br>GAA GCA                                                           | GAG ATT ATC <u>GAT</u> GAG GAA<br>GCA                                                                                 |
| psPAX2    | psPAX2 variant                    | CAT CCA <u>GTG</u> CAT GCA<br>GGG CCT <u>ATT</u> <u>GCA</u> <u>CCA</u><br>GGC CAG <u>ATG</u>    | CAT CCA <u>ATC</u> CAT GCA GGG<br>CCT <u>CTT</u> <u>CCA</u> <u>GCA</u> GGC CAG<br><u>CTG</u>                          |

**Table S2 shRNA used in the study, related to Experimental Procedures**

| Target               | shRNA identifier | Source or TRC identifier      | Target sequence         |
|----------------------|------------------|-------------------------------|-------------------------|
| CypA ( <i>PPIA</i> ) | #1               | custom                        | CTGGCATCTTGTCCATGGCAAA  |
| CypA ( <i>PPIA</i> ) | #2               | custom                        | GGTTCCTGCTTTCACAGAATTA  |
| CypA ( <i>PPIA</i> ) | #3               | custom                        | TGTGGTGTGTTGGCAAAGTGAAA |
| TNPO3                | #3               | TRCN0000038331                | CGGCGCACAGAAATTATAGAA   |
| CPSF6                | #5               | TRCN00000000154               | ACCATAGTAGATCACGAGAAA   |
| NUP153               | #6               | (Matreyek and Engelman, 2011) | AGTGTTCAGTATGCTGTGTTTCT |
| RANBP2               | #1               | custom                        | AACTCAGTGCCTGATGGATATC  |
| RANBP2               | #3               | custom                        | ACTTGTCAGTGTCCAAGTAAAC  |
| MX2                  | #1               | TRCN0000056713                | GCCAACCAGATCCCATTATA    |
| TRIM5                | #2               | custom                        | CCCTGTGTGCCGGATCAGTTAC  |
| TRIM5                | #3               | custom                        | TGAGAGAGAACTTCTACTCTTC  |
| LacZ                 | /                | custom                        | GCGATCGTAATCACCCGAGTG   |
| SUN2                 | #4               | TRCN0000143335                | GCCTATTACAGACGTTTCACTT  |
| SUN2                 | #5               | TRCN0000143336                | GAGGAAATCCAGCAACATGAA   |

**Table S3 Antibodies used in the study, related to Experimental Procedures**

| <i>Antigen</i> | <i>Source</i>                                                                                                                                                                       | <i>Clone or name</i> |
|----------------|-------------------------------------------------------------------------------------------------------------------------------------------------------------------------------------|----------------------|
| CD86           | eBioscience                                                                                                                                                                         | IT2.2                |
| CD14           | eBioscience                                                                                                                                                                         | 61D3                 |
| CD11c (mouse)  | BD Biosciences                                                                                                                                                                      | HL3                  |
| CD4            | BD Biosciences                                                                                                                                                                      | RPA-T4               |
| Gag/capsid     | The following reagent was obtained through the AIDS Research and Reference Reagent Program, Division of AIDS, NIAID, NIH: HIV-1 p24 Hybridoma (183-H12-5C) from Dr. Bruce Chesebro. | 183-H12-5C           |
| Vpx            | The following reagent was obtained through the AIDS Research and Reference Reagent Program, Division of AIDS, NIAID, NIH: HIV-2 Vpx Hybridoma (6D2.6) from Dr. John C. Kappes.      | 6D2.6                |
| Actin          | Millipore                                                                                                                                                                           | C4                   |
| CypA (Rat)     | R&D Systems                                                                                                                                                                         | 817815               |
| CypA (Goat)    | R&D Systems                                                                                                                                                                         | AF3589               |
| MX2            | SIGMA                                                                                                                                                                               | HPA030235            |
| MX1            | ABCAM                                                                                                                                                                               | ab95926              |
| CPSF6          | Novus Biologicals                                                                                                                                                                   | NBP1-85676           |
| TNPO3          | ABCAM                                                                                                                                                                               | 3152C2a              |
| HA (tag)       | Cell Signalling                                                                                                                                                                     | C29F4                |
| Flag (tag)     | SIGMA                                                                                                                                                                               | F3165                |
| SUN2           | Atlas                                                                                                                                                                               | HPA001209            |
| SUN2           | ABCAM                                                                                                                                                                               | EPR6557              |
| V5 tag         | eBioscience                                                                                                                                                                         | TCM5                 |

**Table S4 Real-time quantitative PCR primers used in the study for RNA quantification, related to Experimental Procedures**

| <i>Primer name</i>    | <i>Sequence</i>           |
|-----------------------|---------------------------|
| Nup153-B-f            | TTGAAGTATCTTTGTAGCCACCC   |
| Nup153-B-r            | GGGGCCAATTAAGCCTTACC      |
| RANBP2-B-f            | AGCAAGATCATATTCTTTAGCTTCA |
| RANBP2-B-r            | CTGACGTGGAGCGGTACAT       |
| TRIM5 $\alpha$ -182-f | CTGTATTTACCTTGGGATCTGTG   |
| TRIM5 $\alpha$ -402-r | TCTAGCATGGACTTCTTGTGG     |
| bactin737f            | GGACTTCGAGCAAGAGATGG      |
| bactin970r            | AGCACTGTGTTGGCGTACAG      |

**Table S5 Real-time quantitative PCR primers used in the study for DNA quantification, related to Experimental Procedures**

| <i>Strain</i>         | <i>Apmlification</i> | <i>Primer Name</i> | <i>Sequence</i>             | <i>Optimal annealin<br/>g °C</i> |
|-----------------------|----------------------|--------------------|-----------------------------|----------------------------------|
| Human                 | beta-globin          | bglobin-f          | CCCTTGGACCCAGAGGTTCT        | 50                               |
| Human                 | beta-globin          | bglobin-r          | CGAGCACTTTCTTGCCATGA        | 50                               |
| HIV-2                 | Late RT              | hiv2-3'U3-fwd      | GAAGGGATGTTTTACCATTAGTTA    | 50                               |
|                       | Late RT              | hiv2-psi-rev       | GTTCCAAGACTTCTCAGTCTTCTTC   | 50                               |
| HIV-2                 | 2LTR                 | hiv2-3'U3-rev      | TAACTAAATGGTAAAACATCCCTTC   | 50                               |
|                       | 2LTR                 | hiv2-R-fwd         | GTTCTCTCCAGCACTAGCAGGTA     | 50                               |
| HIV-2<br>First round  | Integrated DNA       | alul               | GCCTCCCAAAGTGCTGGGATTACAG   | 50                               |
|                       | Integrated DNA       | hiv2-r             | AAGGGTCCTAACAGACCAGGGTCT    | 50                               |
| HIV-2<br>Second round | Integrated DNA       | hiv2-f2            | GCAGGTAGAGCCTGGGTGTTC       | 50                               |
|                       | Integrated DNA       | hiv2-r2            | CAGGCGGCGACTAGGAGAGAT       | 50                               |
| HIV-1                 | Late RT              | hiv1-3'U3-fwd      | GCATGGAATGGATGACCCTGAGA     | 65                               |
|                       | Late RT              | hiv1-psi-rev2      | CGTCGAGAGATCTCCTCTGGCTTTA   | 65                               |
| HIV-1                 | 2LTR JNCT            | Junct4 -fwd        | CAGTGTGGAAAATCTCTAGCAGTACTG | 65                               |
|                       | 2LTR JNCT            | Junct2-rev         | GCCGTGCGCGCTTCAGCAAGC       | 65                               |
| HIV-1<br>First round  | Integrated DNA       | alul               | GCCTCCCAAAGTGCTGGGATTACAG   | 65                               |
|                       | Integrated DNA       | hiv1-psi-rev2      | CGTCGAGAGATCTCCTCTGGCTTTA   | 65                               |
| HIV-1<br>Second round | Integrated DNA       | hiv1-f2            | CTGGGAGCTCTCTGGCTAACTA      | 65                               |
|                       | Integrated DNA       | hiv1-r2            | AACAGACGGGCACACACTACTT      | 65                               |



## Supplemental Experimental Procedures

### Constructs

For PCR mutagenesis, corresponding sequences are listed in **Table S1**. CMV-VSVG, psPAX2, pLKO1puro and pSIV3+ were described elsewhere (Manel et al., 2010). Replication-competent X4-GFP is NL4-3 with GFP in Nef (Motsinger et al., 2002; Unutmaz et al., 1999). pTRIP-CMV-puro-2A and pTRIP-SFFV (coding for GFP) were generated from pTRIP (Zennou et al., 2000) and GAE-SFFV-GFP-WPRE obtained from Jean-Luc Battini (Mamede et al., 2013). pCIG3 N (a generous gift from Towers Greg (Bock et al., 2000)), pCL10A1 (Naviaux et al., 1996) and pRV.GFP were previously described. shRNA against LacZ, MX2, TNPO3, CPSF6, CypA(PPIA), RANBP2, NUP153, TRIM5 and SUN2 were in the pLKO1puro vector and are listed in **Table S2**.

### Cells

Human peripheral blood mononuclear cells were isolated from buffy coats from normal human donors (approved by the Institut National de la Santé et de la Recherche Médicale ethics committee) using Ficoll-Paque PLUS (GE). Macaque peripheral blood mononuclear cells were isolated from macaques using 5% PBS 95% Ficoll-Paque PLUS. CD14+ cells were isolated by a positive selection with anti-human CD14 magnetic beads (Miltenyi). Purity was checked by flow cytometry using an anti-CD14 antibody (antibodies are listed in Table S3) and purity was superior to 99%. CD14+ cells were cultured in RPMI medium, 10% FBS (Biowest), Penicillin-Streptomycin, Gentamicin (50 µg/ml, Gibco) and HEPES (Gibco) in the presence of recombinant human GM-CSF (Miltenyi) at 10ng/ml and IL-4 (Miltenyi) at 50ng/ml. Fresh media was added at day 3, and cells were stimulated or infected at day 4. CD4+ T cells were isolated by a positive selection with anti-human CD4 magnetic beads (Miltenyi) from the CD14-negative fraction of PBMCs. Purity was checked by flow cytometry using an anti-CD4 antibody (antibodies are listed in Table S3) and purity was superior to 95-96%. CD4+ cells were cultured at 1 million per ml (200µl/well in round-bottomed 96-well plates) in RPMI medium, 10% FBS (Biowest), Penicillin-Streptomycin, Gentamicin (50µg/ml, Gibco) and 1000 U/ml human IL-2 and activated with the T Cell Activation/Expansion Kit (Miltenyi).

Bone marrow was taken from *Sun2*<sup>-/-</sup>, *Sun1*<sup>-/-</sup> or WT littermate control mice, to differentiate mouse dendritic cells (BMDCs). Mouse bone-marrow progenitors were cultured for 10 days in DC medium (IMDM, FCS (10%), Glutamine (20mM), pen-strep (100U/mL) and 2-mercaptoethanol (50µM)), supplemented with granulocyte-macrophage colony stimulating factor (50ng/mL)-containing supernatant obtained from transfected J558 cells. After 4 days of differentiation, all cells were passed to a density of 10 millions per 165 cm<sup>2</sup>.

### Mice

All animal care and experimental procedures were conducted in accord with requirements approved by the Institutional Animal Care and Use Committee of Yale University. *Sun1*<sup>-/-</sup> (strain B6;129S6-*Sun1*<sup>tm1Mhan/J</sup>), *Sun2*<sup>-/-</sup> (strain B6;129S6-*Sun2*<sup>tm1Mhan/J</sup>) and C57BL/6 WT mice were obtained from Jackson Labs. *Sun1*<sup>-/-</sup> mice were previously generated through the replacement of exons 10-13 with a neomycin resistance cassette (Ding et al., 2007). *Sun2*<sup>-/-</sup> mice were previously generated through the replacement of exons 11-16 and part of exon 17 with a neomycin resistance cassette (Lei et al., 2009).

### Virus production

For transfection of 3µg plasmid DNA per well, plasmid quantities were as follows: for VSV-G pseudotyped SIVmac VLPs, 0.4µg CMV-VSVG and 2.6µg pSIV3<sup>+</sup>; for HIV-1, HIV-2 and SIVmac239 VSV-G pseudotyped viruses, 0.4µg CMV-VSVG and 2.6µg HIV or SIV DNA; for replication-competent HIV-1, 3µg X4-GFP; for MLV VSV-G pseudotyped viruses, 0.4µg CMV-VSVG, 1.6µg MLV DNA (pRV.GFP) and 1µg pCL10A1 (TRIM5α resistant) or pCIG3 N (TRIM5α sensitive); for shRNA vectors in MDDCs and THP-1 cells, 0.4µg CMV-VSV-G, 1µg psPAX2 and 1.6µg pLKO1puro-derived shRNA; for shRNA vectors in primary CD4+ T cells, 0.2µg HXB2 envelope expression plasmid (Boggiano et al., 2007), 0.2µg CMV-VSV-G, 1µg psPAX2 and 1.6 µg pLKO1puro-derived shRNA; for expression vectors 0.4 µg CMV-VSV-G, 1µg psPAX2 and 1.6µg pTRIP-CMV-tagRFP-2A, pLX304 (Empty vector) or pLX304-SUN2 (overexpression SUN2-V5, clone HsCD00436663 from DNASU; Genbank: AM392760). Empty pLX304 was generated by removing SUN2 from pLX304-SUN2 with BsrGI.

### Infections.

For MDDCs infection, 50 µl of media or SIVmac VLPs were first added and 100 µl of media or dilutions of viral supernatants to 100µl of cells. Azidothymidine (AZT, SIGMA), Raltegravir (RAL, Euromedex) or Cyclosporin A (CypA, Selleckchem) were added respectively at 24µM, 20µM and 2µM. CBS1 is a small molecular inhibitor of CypA that binds the hydrophobic and the Abu pockets of CypA (Guichou et al., 2011) (Hakim Ahmed-Belkacem, Jean-François Guichou, Jean-Michel Pawlotsky, unpublished data) and was added at 2µM. For CD4+ T cells infection, one hundred microliter of media or dilutions of viral supernatants were added to 100µl of cells in presence or not of 2 µM of CsA, 60 µM of CBS1 or 25 µM of AZT plus 10 µM of

Nevirapine (NVP) (Sigma). For BMDCs infection, 100  $\mu$ l of media or dilutions of viral supernatants were added in presence or not of 2  $\mu$ M of CsA. 72h after infection, cells were stained with anti-mouse CD11c and analyzed.

### Knock-down and overexpression

**Table S2** lists the shRNA sequences used. THP-1 cells were transduced with a control empty vector pLKO1puro (shRNA vector targeting LacZ) or a single shRNA vectors in pLKO1puro. Puromycin was added at day 2 (2ng/ml). Knock-down efficiency was measured by western blotting or qPCR at day 10 (for THP-1 cells). Cells were seeded at 1 million per ml in 96-well flat bottom plate in 200  $\mu$ l of final volume treated or not with PMA (30ng/ml) for 16 hours. Media was replaced with 100 $\mu$ l of fresh media and 100 $\mu$ l of media or dilutions of viral supernatants were added. Monocytes were transduced with shRNA vectors as previously described (Manel et al., 2010; Satoh and Manel, 2013). Knock-down efficiency was measured by western blotting or qPCR at day 4 or 6. DCs were harvested, counted, seeded at 0.5 million per ml in 96-well U bottom plate and infected or stimulated in 200  $\mu$ l of final volume. For knock-down experiments in CD4<sup>+</sup> T cells, after 24h of activation in 96-well plates, media was changed by 100 $\mu$ l of fresh media with 8 $\mu$ g/ml of protamine and cells were transduced with 100 $\mu$ l of shRNA lentivector supernatants. Cells were spinoculated at 1200g, 2h at 25°C. At day 3, media was changed in presence of puromycin (2ng/ml). For single-round infection experiments, cells were split at day 4 and day 6. At day 7, CD4<sup>+</sup> T cells were harvested, counted, seeded and infected. For experiment with replication-competent virus X4-GFP, cells were harvested, counted, seeded and infected at day 4. 10h later, viral inoculum was washed. Accumulation of HIV-1 p24 was measured at days 5 to 8 by ELISA (Clontech Takara Lenti-X p24 Rapid Titer Kit). For overexpression in DCs, monocytes were transduced with vectors pTRIP-CMV-tagRFP-2A or pTRIP-CMV-tagRFP-2A-FLAG-ntCypA as previously described (Manel et al., 2010; Satoh and Manel, 2013). Overexpression efficiency was measured by western blotting or RFP expression at day 6. For overexpression in HeLa, cells were transduced with pLX304 or pLX304-SUN2 and selected with 15 $\mu$ g/mL of blasticidine. Overexpression efficiency was measured by western blotting at day 10.

### HIV cDNA Real-time PCR

Total cellular DNA was harvested using a Nucleospin Tissue kit (Machery-Nagel). Real-time PCR analysis was adapted from (Brussel and Sonigo, 2003) and performed in a Roche LightCycler 480 using Roche 480 SYBR Green I master reagent in 20  $\mu$ l final volume per well according to manufacturer specifications. Each sample was measured in triplicate for all primers (primer sequences are listed in **Table S5**). For beta-globin, primers were bglobin-f and bglobin-r. For HIV-2 late RT, primers were hiv2-3'U3-fwd and hiv2-psi-rev. For HIV-2 2LTR, primers were hiv2-3'U3-rev and hiv2-R-fwd. For HIV-2 integrated DNA two rounds of amplification were performed. For the first round, primers were alu1 and hiv2-r. For the second round, 1  $\mu$ l of first-round reaction was used as template, and primers were hiv2-f2 and hiv2-r2. For HIV-1 late RT, primers were hiv1-3'U3-fwd and hiv1-psi-rev2. For HIV-1 2LTR JNCT, primers were Junct4 -fwd and Junct2-rev. For HIV-1 integrated DNA two rounds of amplification were performed. For the first round, primers were alu1 and hiv1-psi-rev2. For the second round, 1  $\mu$ l of first-round reaction was used as template, and primers were hiv1-f2 and hiv1-r2. Cycling conditions were 1x 95°C 5'; 35x 95°C, 10"-50°C or 65°C, 20"-72°C 30". Relative concentrations of late RT, 2LTR and integrated viral DNA were calculated relative to beta-globin using the  $\Delta$ Ct method.

### Gene expression quantification

Ten days after lentiviral vector transduction, total RNA was extracted from 1 million THP-1 cells using Nucleospin RNA II kit (Machery-Nagel). cDNA was synthesized with random hexamer from 0.1 $\mu$ g total RNA using SuperScript III Reverse Transcriptase (Invitrogen). Real-time qPCR was performed using SYBR Green I Master (Roche). The relative quantities of target mRNAs were calculated between target RNA Cp and ACTB Cp ( $2^{-\Delta C_p}$  method). The primer sequences are listed in **Table S4**.

### Western Blotting

0.2 to 2 millions cells were lysed in 80  $\mu$ L of Lysis buffer (50mM Tris HCl pH 8, 120mM NaCl, 4mM EDTA, 1% NP40 and 1x EDTA-free protease inhibitors cocktail (Roche)). Lysates were cleared by centrifugation at 6000g for 7 minutes at 4°C. Virus supernatants were filtered at 0.45 $\mu$ m, centrifugated at 16000g for 1 h 30 min at 4°C. Virus pellets were lysed in 15 $\mu$ l of Lysis buffer. Cellular and viral protein lysates were resolved on 4%-20% Biorad precast SDS-PAGE gels and transferred on nitrocellulose membrane. Proteins were blotted with antibodies as follow: mouse anti-Gag/capsid; mouse anti-Vpx; mouse anti-actin; rabbit anti-CypA (antibodies are listed in **Table S3**). ECL signal was recorded on the ChemiDoc XRS Biorad Imager. Data was analyzed and quantified with the Image Lab software (Biorad).

### Morphological Analysis

Cells were subjected to cytospin and colored with May-Grunwald/Giemsa staining. Pictures were taken with a Nikon DS-FI1 High-definition color camera head on a Nikon Eclipse TS100 inverted microscope.

### **Immunofluorescence**

HeLa cells monolayers grown on glass poly-Lysine coverslip were fixed with 4% paraformaldehyde in PBS at room temperature for 10 min and incubated in Glycine-PBS buffer (375 mg Glycine in 50ml of PBS) for 15min. Cells were permeabilized in 0.2% BSA, 0.1% Saponin in PBS for 30min and stained with SUN2 (Atlas Ig – 1/1000) and V5 (eBioscience Ig – 1/1000) in 0.2% BSA, 0.1% Saponin in PBS at room temperature for 5h. Followed this incubation, washes and secondary antibody staining were performed in the same buffers, with the corresponding immunoglobulin G (IgG) antibody conjugated to Alexa 488 (SUN2) or Alexa 647 (V5 tag) at the dilution of 1/500 at room temperature for 1h. The cells were mounted onto glass slides by using Dapi Fluoromont G (eBioscience) to stain nuclei and imaged on a Zeiss *LSM 780* Confocal Microscope. ImageJ (National Institutes of Health, Bethesda MD) software was used for image processing and for the Z-projection (base on the maximum of intensity for each z stack).

### **Ethic approval for macaque blood**

Adult cynomolgus macaques (*Macaca fascicularis*) were used at CEA in accordance with French national regulation and under national veterinary inspectors (CEA permit no. A 92-032-02). CEA is in compliance with Standards for Human Care and Use of Laboratory of the Office for Laboratory Animal Welfare (OLAW; OLAW assurance no. A5826-01). The use of nonhuman primates at CEA is in accordance with recommendation with the European Directive (2010/63; recommendation no. 9). No suffering was specifically associated with the treatment and sample procedure to obtain nasal washes. The animals were used under the supervision of the veterinarians in charge of the animal facility. No suffering was specifically associated with the sampling procedure to obtain peripheral blood. Peripheral blood was obtained from healthy animals by venipuncture at the femoral vein after sedation with ketamine chlorhydrate (Rhone-Merieux, Lyon, France, 10 mg/kg) as previously described (Dioszeghy et al., 2006) and collected on heparinized CPT tubes (BD, Franklin Lakes, NJ).

## Supplemental References

- Bock, M., Bishop, K.N., Towers, G., and Stoye, J.P. (2000). Use of a transient assay for studying the genetic determinants of Fv1 restriction. *Journal of virology* *74*, 7422-7430.
- Boggiano, C., Manel, N., and Littman, D.R. (2007). Dendritic cell-mediated trans-enhancement of human immunodeficiency virus type 1 infectivity is independent of DC-SIGN. *Journal of virology* *81*, 2519-2523.
- Brussel, A., and Sonigo, P. (2003). Analysis of early human immunodeficiency virus type 1 DNA synthesis by use of a new sensitive assay for quantifying integrated provirus. *Journal of virology* *77*, 10119-10124.
- Ding, X., Xu, R., Yu, J., Xu, T., Zhuang, Y., and Han, M. (2007). SUN1 is required for telomere attachment to nuclear envelope and gametogenesis in mice. *Dev Cell* *12*, 863-872.
- Dioszeghy, V., Benlhassan-Chahour, K., Delache, B., Dereuddre-Bosquet, N., Aubenque, C., Gras, G., Le Grand, R., and Vaslin, B. (2006). Changes in soluble factor-mediated CD8+ cell-derived antiviral activity in cynomolgus macaques infected with simian immunodeficiency virus SIVmac251: relationship to biological markers of progression. *Journal of virology* *80*, 236-245.
- Guichou, J., Colliandre, L., Ahemed-Belkacem, H., and Pawlowsky, J. (2011). New inhibitors of cyclophilins and uses thereof. Patent WO2011076784.
- Lei, K., Zhang, X., Ding, X., Guo, X., Chen, M., Zhu, B., Xu, T., Zhuang, Y., Xu, R., and Han, M. (2009). SUN1 and SUN2 play critical but partially redundant roles in anchoring nuclei in skeletal muscle cells in mice. *Proceedings of the National Academy of Sciences of the United States of America* *106*, 10207-10212.
- Mamede, J.I., Sitbon, M., Battini, J.L., and Courgnaud, V. (2013). Heterogeneous susceptibility of circulating SIV isolate capsids to HIV-interacting factors. *Retrovirology* *10*, 77.
- Manel, N., Hogstad, B., Wang, Y., Levy, D.E., Unutmaz, D., and Littman, D.R. (2010). A cryptic sensor for HIV-1 activates antiviral innate immunity in dendritic cells. *Nature* *467*, 214-217.
- Matreyek, K.A., and Engelman, A. (2011). The requirement for nucleoporin NUP153 during human immunodeficiency virus type 1 infection is determined by the viral capsid. *Journal of virology* *85*, 7818-7827.
- Motsinger, A., Haas, D.W., Stanic, A.K., Van Kaer, L., Joyce, S., and Unutmaz, D. (2002). CD1d-restricted human natural killer T cells are highly susceptible to human immunodeficiency virus 1 infection. *The Journal of experimental medicine* *195*, 869-879.
- Naviaux, R.K., Costanzi, E., Haas, M., and Verma, I.M. (1996). The pCL vector system: rapid production of helper-free, high-titer, recombinant retroviruses. *Journal of virology* *70*, 5701-5705.
- Satoh, T., and Manel, N. (2013). Gene transduction in human monocyte-derived dendritic cells using lentiviral vectors. *Methods Mol Biol* *960*, 401-409.
- Unutmaz, D., KewalRamani, V.N., Marmon, S., and Littman, D.R. (1999). Cytokine signals are sufficient for HIV-1 infection of resting human T lymphocytes. *The Journal of experimental medicine* *189*, 1735-1746.
- Zennou, V., Petit, C., Guetard, D., Nerhass, U., Montagnier, L., and Charneau, P. (2000). HIV-1 genome nuclear import is mediated by a central DNA flap. *Cell* *101*, 173-185.
